# Supplementary material for: High gain broadband photoconductor based on amorphous Ga2O3 and suppression of persistent photoconductivity
Source: Royal Society of Chemistry journal article supplement (doi:10.1039/c9tc05159g), 2019-01-01
Supplement: c9tc05159g1.pdf [file c9tc05159g1.pdf]

## Supporting Information

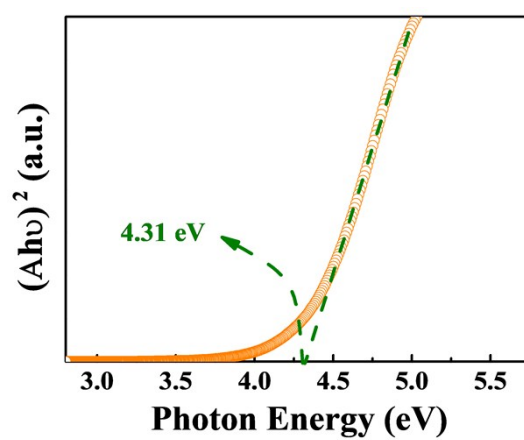

**Figure S1.** the  $(Ah\nu)^2$  vs  $h\nu$  diagram and the band gap of the a-Ga<sub>2</sub>O<sub>3</sub> film.

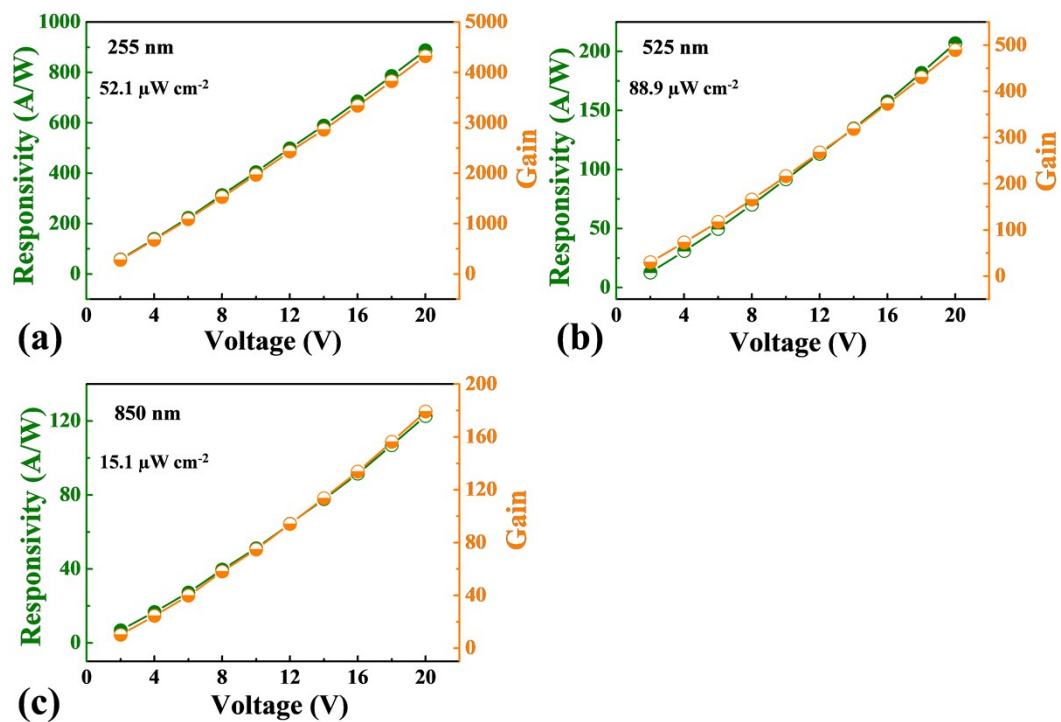

**Figure S2.** Both responsivity and gain of the a-Ga<sub>2</sub>O<sub>3</sub> detector irradiated by the three given wavelengths of (a) DUV-255 nm (b) Vis-525 nm and (c) NIR-850 nm with different bias voltages.

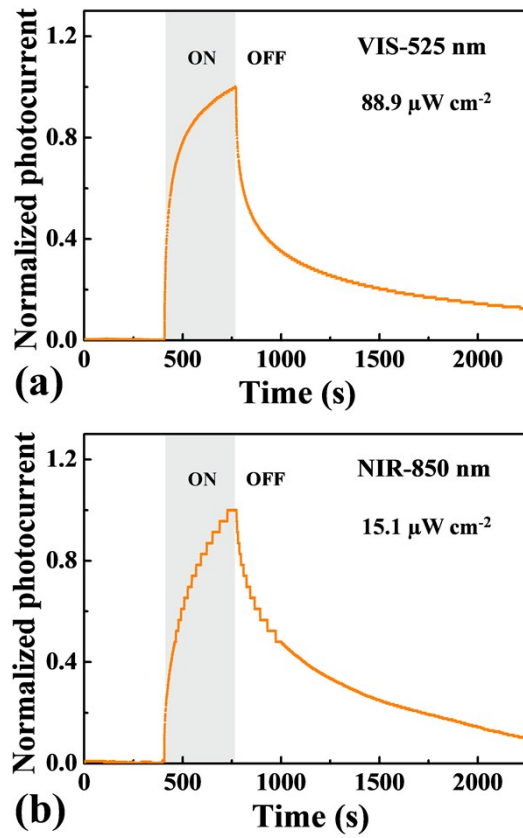

**Figure S3.** Typical PPC behavior in a-Ga<sub>2</sub>O<sub>3</sub> film irradiated by the two given wavelengths of (a) VIS-525 and (b) NIR-850 nm with 5 V bias.

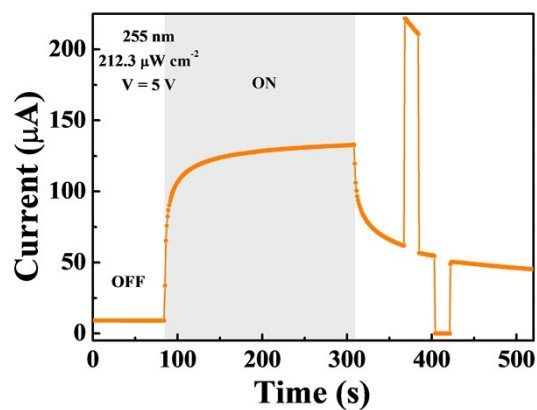

**Figure S4.** The time-dependent photoresponse of the  $\alpha$ -Ga<sub>2</sub>O<sub>3</sub> photodetector to UV illumination at RT. Notably, the application of 20 V pulse voltage or open circuit can not change the photocurrent decay rate obviously.

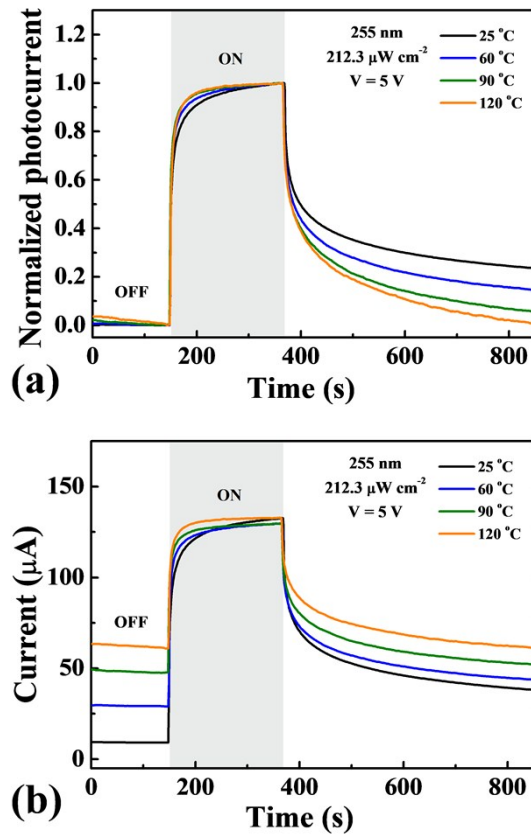

**Figure S5.** (a) Typical PPC behavior in a-Ga<sub>2</sub>O<sub>3</sub> film irradiated by 255 nm UV light with 5 V applied voltage under different temperatures. (b) The time-dependent photoresponse of the a-Ga<sub>2</sub>O<sub>3</sub> photodetector to 255 nm illumination at different temperatures.
